# Supplementary material for: U–Pb dating of andradite-rich garnet by SIMS
Source: Royal Society of Chemistry journal article supplement (doi:10.1039/d1ja00384d), 2022-01-01
Supplement: d1ja00384d1.pdf [file d1ja00384d1.pdf]

### Session 1

| Name      | <sup>238</sup> U/ <sup>206</sup> Pb | error(1σ%) | <sup>207</sup> Pb/ <sup>206</sup> Pb | error(1σ%) | U/μg/g | Th/μg/g | Th/U | <sup>140</sup> Ce <sup>16</sup> O <sub>2</sub> /cps | Age/Ma | error/Ma | f <sub>206</sub> /% |
|-----------|-------------------------------------|------------|--------------------------------------|------------|--------|---------|------|-----------------------------------------------------|--------|----------|---------------------|
| 15MC@1    | 65.3                                | 1.1        | 0.053                                | 2.3        | 12.5   | 10.5    | 0.84 | 17561                                               | 97.7   | 1.1      | 0.7                 |
| 15MC@2    | 65.1                                | 1.2        | 0.057                                | 1.5        | 11.5   | 11.1    | 0.96 | 16687                                               | 97.5   | 1.2      | 1.2                 |
| 15MC@3    | 67.6                                | 1.1        | 0.056                                | 2.6        | 12.5   | 14.6    | 1.16 | 14510                                               | 94.0   | 1.1      | 1.0                 |
| 15MC@4    | 64.1                                | 1.1        | 0.054                                | 2.9        | 12.3   | 11.6    | 0.94 | 17432                                               | 99.4   | 1.1      | 0.8                 |
| 15MC@5    | 65.3                                | 1.0        | 0.052                                | 3.2        | 12.7   | 12.3    | 0.96 | 16884                                               | 97.8   | 1.0      | 0.5                 |
| 15MC@6    | 65.1                                | 1.0        | 0.053                                | 2.5        | 17.7   | 19.2    | 1.08 | 15523                                               | 97.9   | 1.0      | 0.7                 |
| 15MC@7    | 65.3                                | 1.1        | 0.053                                | 1.5        | 19.1   | 21.6    | 1.13 | 15435                                               | 97.7   | 1.1      | 0.7                 |
| 15MC@8    | 64.5                                | 1.3        | 0.055                                | 2.5        | 12.0   | 10.1    | 0.84 | 14276                                               | 98.7   | 1.3      | 0.9                 |
| 15MC@9    | 65.9                                | 1.6        | 0.054                                | 3.2        | 9.3    | 1.1     | 0.12 | 13709                                               | 96.6   | 1.8      | 0.8                 |
| 15MC@10   | 65.2                                | 1.7        | 0.054                                | 3.3        | 8.7    | 1.0     | 0.12 | 13505                                               | 97.7   | 1.8      | 0.7                 |
| 43(B6)@1  | 10.6                                | 0.9        | 0.063                                | 0.7        | 22.8   | 22.1    | 0.97 | 12552                                               | 579.0  | 5.3      | 0.5                 |
| 43(B6)@2  | 10.5                                | 1.1        | 0.065                                | 0.5        | 17.9   | 12.8    | 0.72 | 11591                                               | 581.9  | 6.2      | 0.7                 |
| 43(B6)@3  | 10.6                                | 1.0        | 0.064                                | 0.3        | 17.4   | 16.8    | 0.96 | 12175                                               | 579.0  | 5.5      | 0.5                 |
| 43(B6)@4  | 10.6                                | 0.9        | 0.073                                | 0.7        | 40.9   | 28.0    | 0.68 | 13010                                               | 575.0  | 5.3      | 1.7                 |
| 43(B6)@5  | 10.7                                | 0.9        | 0.062                                | 0.9        | 19.8   | 67.7    | 3.42 | 11845                                               | 573.6  | 5.3      | 0.4                 |
| 43(B6)@6  | 10.8                                | 0.9        | 0.062                                | 0.7        | 19.4   | 45.1    | 2.33 | 11091                                               | 568.0  | 5.1      | 0.4                 |
| 43(B6)@7  | 10.5                                | 1.0        | 0.071                                | 1.6        | 11.4   | 8.3     | 0.73 | 10844                                               | 581.4  | 5.8      | 1.5                 |
| 43(B6)@8  | 10.3                                | 1.0        | 0.065                                | 1.4        | 20.7   | 15.8    | 0.76 | 10720                                               | 593.4  | 5.9      | 0.7                 |
| 43(B6)@9  | 10.8                                | 0.9        | 0.062                                | 0.9        | 17.8   | 14.2    | 0.79 | 10460                                               | 571.9  | 5.3      | 0.4                 |
| 43(B6)@10 | 10.5                                | 1.0        | 0.062                                | 1.0        | 18.4   | 55.1    | 2.98 | 10283                                               | 587.8  | 6.0      | 0.4                 |
| 43(B6)@11 | 10.3                                | 1.1        | 0.062                                | 0.7        | 12.5   | 9.7     | 0.78 | 3804                                                | 599.7  | 6.6      | 0.4                 |
| IR18@1    | 17.7                                | 1.0        | 0.057                                | 0.8        | 32.2   | 16.0    | 0.50 | 11377                                               | 354.9  | 3.5      | 0.4                 |
| IR18@2    | 17.9                                | 1.0        | 0.056                                | 0.7        | 32.5   | 15.0    | 0.46 | 10980                                               | 351.2  | 3.4      | 0.3                 |
| IR18@3    | 17.6                                | 1.0        | 0.057                                | 0.6        | 35.7   | 19.4    | 0.54 | 11406                                               | 355.8  | 3.3      | 0.4                 |

| Name    | $^{238}\text{U}/^{206}\text{Pb}$ | error(1 $\sigma$ %) | $^{207}\text{Pb}/^{206}\text{Pb}$ | error(1 $\sigma$ %) | U/ $\mu\text{g/g}$ | Th/ $\mu\text{g/g}$ | Th/U | $^{140}\text{Ce}^{16}\text{O}_2/\text{cps}$ | Age/Ma | error/Ma | $f_{206}/\%$ |
|---------|----------------------------------|---------------------|-----------------------------------|---------------------|--------------------|---------------------|------|---------------------------------------------|--------|----------|--------------|
| IR18@4  | 15.5                             | 1.0                 | 0.146                             | 0.6                 | 32.7               | 16.8                | 0.51 | 11250                                       | 357.4  | 4.7      | 11.7         |
| IR18@5  | 17.8                             | 0.9                 | 0.057                             | 0.6                 | 33.3               | 17.7                | 0.53 | 11482                                       | 352.8  | 3.3      | 0.4          |
| IR18@6  | 17.9                             | 0.9                 | 0.057                             | 0.4                 | 33.9               | 18.0                | 0.53 | 10882                                       | 349.9  | 3.2      | 0.4          |
| IR18@7  | 18.1                             | 1.0                 | 0.057                             | 0.6                 | 33.0               | 15.0                | 0.45 | 10481                                       | 347.2  | 3.4      | 0.4          |
| IR18@8  | 17.5                             | 1.0                 | 0.057                             | 1.0                 | 31.1               | 14.0                | 0.45 | 10051                                       | 357.9  | 3.4      | 0.4          |
| IR18@9  | 18.0                             | 1.1                 | 0.056                             | 1.0                 | 33.3               | 17.2                | 0.51 | 9638                                        | 347.7  | 3.8      | 0.3          |
| IR18@10 | 18.0                             | 1.0                 | 0.057                             | 0.5                 | 32.0               | 16.1                | 0.50 | 9297                                        | 349.0  | 3.3      | 0.4          |
| IR18@11 | 17.5                             | 1.1                 | 0.056                             | 1.8                 | 17.6               | 9.0                 | 0.51 | 3702                                        | 358.3  | 3.8      | 0.4          |
| Mali@1  | 30.9                             | 1.2                 | 0.055                             | 2.0                 | 6.7                | 4.9                 | 0.74 | 8314                                        | 204.9  | 2.4      | 0.7          |
| Mali@2  | 31.2                             | 1.3                 | 0.054                             | 1.9                 | 7.7                | 5.3                 | 0.68 | 8395                                        | 203.2  | 2.5      | 0.5          |
| Mali@3  | 32.1                             | 1.1                 | 0.053                             | 2.6                 | 6.6                | 5.3                 | 0.80 | 7298                                        | 197.8  | 2.1      | 0.4          |
| Mali@4  | 30.8                             | 1.1                 | 0.055                             | 1.5                 | 6.0                | 4.7                 | 0.78 | 8371                                        | 205.6  | 2.3      | 0.6          |
| Mali@5  | 30.7                             | 1.1                 | 0.052                             | 1.9                 | 6.5                | 4.8                 | 0.73 | 7746                                        | 207.1  | 2.2      | 0.2          |
| Mali@6  | 30.2                             | 1.2                 | 0.060                             | 3.6                 | 5.3                | 4.4                 | 0.83 | 6928                                        | 208.1  | 2.4      | 1.2          |
| Mali@7  | 30.8                             | 1.2                 | 0.052                             | 3.0                 | 6.4                | 4.8                 | 0.75 | 7442                                        | 206.0  | 2.4      | 0.2          |
| Mali@8  | 31.5                             | 1.1                 | 0.054                             | 2.0                 | 6.8                | 4.7                 | 0.68 | 7184                                        | 201.2  | 2.1      | 0.5          |
| Mali@9  | 31.0                             | 1.0                 | 0.054                             | 2.8                 | 6.5                | 4.9                 | 0.75 | 7225                                        | 204.3  | 2.1      | 0.5          |
| Mali@10 | 30.1                             | 1.1                 | 0.054                             | 1.8                 | 7.0                | 4.1                 | 0.58 | 7531                                        | 210.2  | 2.4      | 0.5          |
| WS20@1  | 5.04                             | 0.9                 | 0.080                             | 0.3                 | 72.1               | 20.7                | 0.29 | 17638                                       | 1169.7 | 10.6     | 0.2          |
| WS20@2  | 5.12                             | 0.9                 | 0.078                             | 0.3                 | 62.1               | 15.5                | 0.25 | 19075                                       | 1154.9 | 10.5     | 0.1          |
| WS20@3  | 5.03                             | 0.9                 | 0.079                             | 0.3                 | 71.7               | 20.9                | 0.29 | 17002                                       | 1173.0 | 10.5     | 0.0          |
| WS20@4  | 5.18                             | 0.9                 | 0.078                             | 0.1                 | 75.3               | 22.8                | 0.30 | 16507                                       | 1140.2 | 10.4     | 0.0          |
| WS20@5  | 5.11                             | 0.9                 | 0.079                             | 0.2                 | 75.7               | 20.6                | 0.27 | 17612                                       | 1155.4 | 10.5     | 0.0          |
| WS20@6  | 5.14                             | 1.0                 | 0.078                             | 0.1                 | 71.1               | 20.1                | 0.28 | 16203                                       | 1149.7 | 11.5     | 0.0          |
| WS20@7  | 5.05                             | 0.9                 | 0.079                             | 0.1                 | 70.3               | 20.7                | 0.29 | 15875                                       | 1167.7 | 10.7     | 0.0          |

| Name     | $^{238}\text{U}/^{206}\text{Pb}$ | error(1 $\sigma$ %) | $^{207}\text{Pb}/^{206}\text{Pb}$ | error(1 $\sigma$ %) | U/ $\mu\text{g/g}$ | Th/ $\mu\text{g/g}$ | Th/U | $^{140}\text{Ce}^{16}\text{O}_2/\text{cps}$ | Age/Ma | error/Ma | $f_{206}/\%$ |
|----------|----------------------------------|---------------------|-----------------------------------|---------------------|--------------------|---------------------|------|---------------------------------------------|--------|----------|--------------|
| WS20@8   | 5.08                             | 0.9                 | 0.079                             | 0.3                 | 70.5               | 17.7                | 0.25 | 14525                                       | 1160.9 | 10.4     | 0.0          |
| WS20@9   | 5.08                             | 0.9                 | 0.079                             | 0.3                 | 68.8               | 17.5                | 0.25 | 14956                                       | 1161.2 | 10.7     | 0.1          |
| WS20@10  | 5.07                             | 1.0                 | 0.076                             | 0.4                 | 63.1               | 17.3                | 0.27 | 13504                                       | 1168.3 | 11.2     | 0.3          |
| WS20@11  | 4.94                             | 1.2                 | 0.078                             | 0.4                 | 54.0               | 18.3                | 0.34 | 10184                                       | 1194.4 | 13.9     | 0.0          |
| wills@01 | 5.54                             | 1.5                 | 0.078                             | 2.1                 | 1.4                | 2.2                 | 1.54 | 19063                                       | 1069.6 | 15.2     | 0.6          |
| wills@02 | 5.52                             | 1.3                 | 0.104                             | 2.9                 | 1.6                | 2.3                 | 1.43 | 20258                                       | 1038.1 | 13.7     | 4.0          |
| wills@03 | 5.63                             | 1.1                 | 0.079                             | 1.7                 | 1.5                | 1.2                 | 0.83 | 18844                                       | 1051.1 | 11.3     | 0.7          |
| wills@04 | 5.71                             | 1.6                 | 0.083                             | 2.4                 | 1.7                | 1.5                 | 0.89 | 20400                                       | 1032.3 | 16.7     | 1.2          |
| wills@05 | 5.91                             | 1.0                 | 0.076                             | 1.1                 | 1.6                | 2.1                 | 1.38 | 19958                                       | 1006.2 | 9.9      | 0.4          |
| wills@06 | 5.93                             | 1.2                 | 0.077                             | 1.8                 | 1.5                | 2.1                 | 1.38 | 19545                                       | 1002.5 | 11.9     | 0.5          |
| wills@07 | 5.75                             | 1.1                 | 0.073                             | 0.5                 | 1.4                | 2.0                 | 1.42 | 18420                                       | 1037.2 | 10.8     | 0.0          |
| wills@08 | 5.81                             | 1.4                 | 0.075                             | 0.5                 | 1.4                | 2.0                 | 1.38 | 17897                                       | 1025.2 | 14.3     | 0.3          |
| wills@09 | 5.47                             | 1.1                 | 0.078                             | 1.8                 | 1.5                | 2.1                 | 1.42 | 17087                                       | 1083.2 | 12.0     | 0.6          |
| wills@10 | 5.46                             | 1.4                 | 0.076                             | 1.7                 | 1.4                | 2.2                 | 1.61 | 13551                                       | 1086.4 | 14.4     | 0.3          |
| wills@11 | 5.68                             | 1.5                 | 0.074                             | 1.2                 | 1.5                | 2.4                 | 1.57 | 15649                                       | 1050.0 | 15.7     | 0.1          |

## Session 2

| Name      | $^{238}\text{U}/^{206}\text{Pb}$ | error(1 $\sigma$ %) | $^{207}\text{Pb}/^{206}\text{Pb}$ | error(1 $\sigma$ %) | U/ $\mu\text{g/g}$ | Th/ $\mu\text{g/g}$ | Th/U | $^{140}\text{Ce}^{16}\text{O}_2/\text{cps}$ | Age/Ma | error/Ma | $f_{206}/\%$ |
|-----------|----------------------------------|---------------------|-----------------------------------|---------------------|--------------------|---------------------|------|---------------------------------------------|--------|----------|--------------|
| 15MC@1    | 66.7                             | 1.6                 | 0.0587                            | 2.7                 | 10.2               | 3.0                 | 0.30 | 13016                                       | 94.9   | 1.6      | 1.36         |
| 15MC@2    | 67.0                             | 1.7                 | 0.0601                            | 2.2                 | 10.6               | 7.8                 | 0.73 | 13471                                       | 94.3   | 1.6      | 1.54         |
| 15MC@3    | 68.6                             | 1.7                 | 0.0546                            | 2.3                 | 12.6               | 10.6                | 0.84 | 12643                                       | 92.9   | 1.6      | 0.84         |
| 15MC@4    | 67.5                             | 1.7                 | 0.0523                            | 4.9                 | 10.6               | 2.8                 | 0.26 | 12427                                       | 94.6   | 1.6      | 0.5          |
| 15MC@5    | 66.7                             | 1.8                 | 0.0601                            | 4.8                 | 10.3               | 3.5                 | 0.33 | 12146                                       | 94.8   | 1.7      | 1.5          |
| 15MC@6    | 67.9                             | 1.8                 | 0.0578                            | 4.5                 | 8.2                | 1.2                 | 0.15 | 10660                                       | 93.4   | 1.7      | 1.3          |
| 15MC@7    | 67.5                             | 1.8                 | 0.0547                            | 4.1                 | 13.7               | 17.6                | 1.29 | 11309                                       | 94.3   | 1.7      | 0.9          |
| 15MC@8    | 66.3                             | 1.8                 | 0.0595                            | 2.6                 | 7.8                | 2.2                 | 0.29 | 10863                                       | 95.4   | 1.7      | 1.5          |
| 15MC@9    | 66.3                             | 1.6                 | 0.0564                            | 3.5                 | 10.1               | 2.5                 | 0.24 | 14010                                       | 95.7   | 1.8      | 1.1          |
| 15MC@10   | 67.9                             | 1.6                 | 0.0531                            | 3.2                 | 18.1               | 15.2                | 0.84 | 14051                                       | 93.9   | 1.7      | 0.7          |
| 15MC@11   | 67.9                             | 1.6                 | 0.0624                            | 4.0                 | 10.5               | 3.7                 | 0.35 | 13547                                       | 92.8   | 1.7      | 1.8          |
| 15MC@12   | 66.9                             | 1.5                 | 0.0528                            | 2.6                 | 10.8               | 2.3                 | 0.22 | 13217                                       | 95.4   | 1.6      | 0.6          |
| 15MC@13   | 63.5                             | 1.9                 | 0.0814                            | 2.2                 | 8.6                | 2.4                 | 0.28 | 14739                                       | 96.9   | 2.1      | 4.2          |
| 15MC@14   | 66.3                             | 1.7                 | 0.0537                            | 3.0                 | 13.7               | 18.5                | 1.35 | 14446                                       | 96.1   | 1.8      | 0.7          |
| 15MC@15   | 67.9                             | 1.6                 | 0.0560                            | 3.2                 | 11.9               | 8.4                 | 0.70 | 13994                                       | 93.6   | 1.7      | 1.0          |
| 43(B6)@1  | 10.2                             | 1.5                 | 0.0875                            | 3.2                 | 17.4               | 14.4                | 0.83 | 9868                                        | 582.6  | 9.1      | 3.6          |
| 43(B6)@2  | 10.8                             | 1.5                 | 0.0621                            | 1.0                 | 18.3               | 19.0                | 1.04 | 9656                                        | 571.7  | 8.6      | 0.3          |
| 43(B6)@3  | 10.7                             | 1.6                 | 0.0628                            | 1.9                 | 13.5               | 9.6                 | 0.71 | 8541                                        | 575.4  | 9.0      | 0.4          |
| 43(B6)@4  | 10.8                             | 1.6                 | 0.0628                            | 1.2                 | 13.2               | 10.2                | 0.77 | 8389                                        | 572.5  | 9.0      | 0.4          |
| 43(B6)@5  | 10.7                             | 1.5                 | 0.0641                            | 1.4                 | 17.4               | 20.3                | 1.16 | 9231                                        | 574.0  | 8.6      | 0.6          |
| 43(B6)@6  | 10.5                             | 1.6                 | 0.0635                            | 0.5                 | 13.5               | 19.4                | 1.43 | 7765                                        | 583.5  | 9.0      | 0.5          |
| 43(B6)@7  | 10.7                             | 1.6                 | 0.0627                            | 1.1                 | 16.8               | 24.6                | 1.46 | 8093                                        | 573.0  | 8.7      | 0.4          |
| 43(B6)@10 | 10.6                             | 1.6                 | 0.0623                            | 1.0                 | 12.1               | 9.8                 | 0.81 | 9528                                        | 582.5  | 9.4      | 0.4          |
| 43(B6)@11 | 10.7                             | 1.6                 | 0.0629                            | 1.0                 | 13.8               | 12.7                | 0.92 | 9325                                        | 575.5  | 9.6      | 0.5          |

| Name      | $^{238}\text{U}/^{206}\text{Pb}$ | error(1 $\sigma$ %) | $^{207}\text{Pb}/^{206}\text{Pb}$ | error(1 $\sigma$ %) | U/ $\mu\text{g/g}$ | Th/ $\mu\text{g/g}$ | Th/U | $^{140}\text{Ce}^{16}\text{O}_2/\text{cps}$ | Age/Ma | error/Ma | $f_{206}/\%$ |
|-----------|----------------------------------|---------------------|-----------------------------------|---------------------|--------------------|---------------------|------|---------------------------------------------|--------|----------|--------------|
| 43(B6)@12 | 10.7                             | 1.5                 | 0.0646                            | 1.3                 | 22.3               | 21.4                | 0.96 | 10200                                       | 572.2  | 9.2      | 0.7          |
| 43(B6)@13 | 10.6                             | 1.6                 | 0.0646                            | 1.2                 | 12.8               | 13.1                | 1.02 | 11147                                       | 577.6  | 9.4      | 0.7          |
| 43(B6)@14 | 10.6                             | 1.5                 | 0.0641                            | 0.7                 | 24.7               | 21.0                | 0.85 | 11131                                       | 578.8  | 9.0      | 0.6          |
| 43(B6)@15 | 10.3                             | 1.6                 | 0.1052                            | 0.9                 | 15.9               | 27.6                | 1.74 | 10181                                       | 566.7  | 9.3      | 5.9          |
| 43(B6)@16 | 11.1                             | 1.6                 | 0.0620                            | 1.0                 | 16.6               | 18.4                | 1.11 | 9372                                        | 557.6  | 8.9      | 0.4          |
| 43(B6)@8  | 4.93                             | 2.8                 | 0.4537                            | 2.7                 | 16.6               | 20.7                | 1.24 | 8642                                        | 619.2  | 46.8     | 50.5         |
| 43(B6)@9  | 6.17                             | 1.8                 | 0.3546                            | 0.7                 | 16.5               | 10.7                | 0.65 | 9286                                        | 619.2  | 13.9     | 37.7         |
| IR18@1    | 17.8                             | 1.5                 | 0.0565                            | 0.8                 | 38.6               | 20.2                | 0.52 | 9707                                        | 352.1  | 5.4      | 0.4          |
| IR18@2    | 17.8                             | 1.5                 | 0.0567                            | 0.4                 | 35.5               | 17.7                | 0.50 | 9217                                        | 351.6  | 5.3      | 0.4          |
| IR18@3    | 17.8                             | 1.5                 | 0.0557                            | 1.3                 | 33.0               | 16.5                | 0.50 | 8935                                        | 353.0  | 5.3      | 0.3          |
| IR18@4    | 17.9                             | 1.5                 | 0.0564                            | 1.2                 | 34.1               | 15.2                | 0.44 | 8699                                        | 351.1  | 5.3      | 0.4          |
| IR18@5    | 17.9                             | 1.5                 | 0.0555                            | 0.4                 | 33.2               | 17.1                | 0.51 | 8764                                        | 351.3  | 5.3      | 0.2          |
| IR18@6    | 17.9                             | 1.6                 | 0.0552                            | 1.1                 | 31.0               | 15.6                | 0.50 | 8223                                        | 351.8  | 5.4      | 0.2          |
| IR18@7    | 17.8                             | 1.5                 | 0.0572                            | 0.8                 | 31.1               | 16.3                | 0.52 | 8209                                        | 351.5  | 5.3      | 0.5          |
| IR18@8    | 17.9                             | 1.5                 | 0.0566                            | 1.4                 | 31.4               | 16.5                | 0.52 | 8279                                        | 351.1  | 5.3      | 0.4          |
| IR18@9    | 17.7                             | 1.5                 | 0.0563                            | 1.2                 | 34.5               | 17.6                | 0.51 | 10545                                       | 353.3  | 5.7      | 0.3          |
| IR18@10   | 17.9                             | 1.5                 | 0.0564                            | 1.0                 | 33.6               | 16.0                | 0.48 | 10248                                       | 349.8  | 5.5      | 0.4          |
| IR18@11   | 17.8                             | 1.6                 | 0.0556                            | 0.5                 | 32.5               | 16.0                | 0.49 | 10082                                       | 351.8  | 5.5      | 0.3          |
| IR18@12   | 17.7                             | 1.5                 | 0.0556                            | 0.9                 | 32.6               | 16.8                | 0.51 | 10041                                       | 355.5  | 5.5      | 0.2          |
| IR18@13   | 17.7                             | 1.5                 | 0.0560                            | 1.0                 | 34.1               | 17.3                | 0.51 | 10418                                       | 353.5  | 5.5      | 0.3          |
| IR18@14   | 17.7                             | 1.5                 | 0.0562                            | 0.6                 | 33.0               | 17.2                | 0.52 | 11123                                       | 355.0  | 5.4      | 0.3          |
| IR18@15   | 17.7                             | 1.5                 | 0.0558                            | 0.7                 | 33.2               | 17.5                | 0.53 | 11167                                       | 355.3  | 5.5      | 0.3          |
| IR18@16   | 17.9                             | 1.5                 | 0.0567                            | 1.0                 | 33.6               | 17.8                | 0.53 | 10549                                       | 349.2  | 5.5      | 0.4          |
| IR18@17   | 17.7                             | 1.5                 | 0.0564                            | 1.0                 | 33.6               | 15.4                | 0.46 | 10552                                       | 354.7  | 5.6      | 0.4          |
| Mali@1    | 31.4                             | 1.6                 | 0.0527                            | 1.4                 | 9.7                | 5.3                 | 0.54 | 6799                                        | 202.2  | 3.1      | 0.3          |

| Name    | $^{238}\text{U}/^{206}\text{Pb}$ | error(1 $\sigma$ %) | $^{207}\text{Pb}/^{206}\text{Pb}$ | error(1 $\sigma$ %) | U/ $\mu\text{g/g}$ | Th/ $\mu\text{g/g}$ | Th/U | $^{140}\text{Ce}^{16}\text{O}_2/\text{cps}$ | Age/Ma | error/Ma | $f_{206}/\%$ |
|---------|----------------------------------|---------------------|-----------------------------------|---------------------|--------------------|---------------------|------|---------------------------------------------|--------|----------|--------------|
| Mali@2  | 31.5                             | 1.8                 | 0.0548                            | 3.1                 | 5.8                | 3.8                 | 0.65 | 6865                                        | 201.1  | 3.7      | 0.6          |
| Mali@3  | 32.0                             | 1.7                 | 0.0522                            | 4.4                 | 6.8                | 4.9                 | 0.72 | 6693                                        | 198.2  | 3.3      | 0.3          |
| Mali@4  | 32.7                             | 1.7                 | 0.0535                            | 3.1                 | 6.7                | 4.7                 | 0.70 | 6285                                        | 194.2  | 3.2      | 0.4          |
| Mali@5  | 31.9                             | 1.8                 | 0.0528                            | 3.5                 | 6.2                | 4.3                 | 0.68 | 6149                                        | 198.9  | 3.5      | 0.3          |
| Mali@6  | 31.6                             | 1.6                 | 0.0535                            | 4.6                 | 6.2                | 4.3                 | 0.70 | 5918                                        | 200.9  | 3.3      | 0.4          |
| Mali@7  | 31.2                             | 1.6                 | 0.0548                            | 2.4                 | 6.3                | 4.6                 | 0.73 | 6350                                        | 202.6  | 3.3      | 0.6          |
| Mali@8  | 31.0                             | 1.8                 | 0.0515                            | 3.0                 | 5.9                | 4.1                 | 0.69 | 5978                                        | 204.8  | 3.6      | 0.2          |
| Mali@9  | 31.4                             | 1.6                 | 0.0546                            | 2.0                 | 7.7                | 4.2                 | 0.55 | 6752                                        | 201.8  | 3.5      | 0.6          |
| Mali@10 | 31.3                             | 1.7                 | 0.0534                            | 3.0                 | 7.6                | 4.5                 | 0.60 | 6776                                        | 202.5  | 3.9      | 0.4          |
| Mali@11 | 31.0                             | 1.6                 | 0.0520                            | 2.7                 | 6.8                | 4.9                 | 0.73 | 6782                                        | 204.6  | 3.5      | 0.2          |
| Mali@12 | 30.8                             | 1.6                 | 0.0539                            | 2.5                 | 5.6                | 3.6                 | 0.63 | 7090                                        | 205.7  | 3.7      | 0.5          |
| Mali@13 | 31.3                             | 1.7                 | 0.0543                            | 2.7                 | 5.3                | 3.6                 | 0.69 | 6401                                        | 202.0  | 3.8      | 0.5          |
| Mali@14 | 30.8                             | 1.5                 | 0.0565                            | 2.4                 | 6.0                | 4.1                 | 0.67 | 6589                                        | 205.2  | 3.5      | 0.8          |
| Mali@15 | 31.6                             | 1.7                 | 0.0541                            | 2.1                 | 6.5                | 4.9                 | 0.75 | 7486                                        | 200.4  | 3.6      | 0.5          |
| Mali@16 | 31.1                             | 1.6                 | 0.0563                            | 2.6                 | 6.8                | 4.8                 | 0.71 | 7127                                        | 203.4  | 3.6      | 0.8          |
| Mali@17 | 31.2                             | 1.6                 | 0.0523                            | 1.7                 | 5.8                | 3.9                 | 0.67 | 7525                                        | 203.6  | 3.5      | 0.3          |
| WS20@1  | 5.07                             | 1.5                 | 0.0790                            | 0.4                 | 81.9               | 25.4                | 0.31 | 14292                                       | 1162.9 | 17.2     | 0.1          |
| WS20@2  | 5.10                             | 1.5                 | 0.0781                            | 0.2                 | 75.3               | 21.8                | 0.29 | 13426                                       | 1159.1 | 17.0     | 0.1          |
| WS20@3  | 5.09                             | 1.5                 | 0.0795                            | 0.4                 | 75.8               | 25.2                | 0.33 | 13321                                       | 1158.1 | 16.9     | 0.1          |
| WS20@4  | 5.11                             | 1.5                 | 0.0794                            | 0.3                 | 72.8               | 21.1                | 0.29 | 13151                                       | 1154.8 | 16.9     | 0.1          |
| WS20@5  | 5.11                             | 1.5                 | 0.0790                            | 0.3                 | 74.2               | 20.5                | 0.28 | 13095                                       | 1155.0 | 16.9     | 0.1          |
| WS20@6  | 5.08                             | 1.5                 | 0.0779                            | 0.3                 | 68.6               | 20.2                | 0.29 | 12031                                       | 1161.9 | 17.0     | 0.1          |
| WS20@7  | 5.10                             | 1.5                 | 0.0792                            | 0.3                 | 68.2               | 19.5                | 0.29 | 11863                                       | 1156.4 | 16.8     | 0.1          |
| WS20@8  | 5.05                             | 1.5                 | 0.0773                            | 0.2                 | 70.9               | 24.1                | 0.34 | 11722                                       | 1169.9 | 17.0     | 0.2          |
| WS20@9  | 5.07                             | 1.5                 | 0.0784                            | 0.2                 | 73.6               | 22.1                | 0.30 | 14778                                       | 1164.1 | 17.5     | 0.0          |

| Name     | $^{238}\text{U}/^{206}\text{Pb}$ | error(1 $\sigma$ %) | $^{207}\text{Pb}/^{206}\text{Pb}$ | error(1 $\sigma$ %) | U/ $\mu\text{g/g}$ | Th/ $\mu\text{g/g}$ | Th/U | $^{140}\text{Ce}^{16}\text{O}_2/\text{cps}$ | Age/Ma | error/Ma | $f_{206}/\%$ |
|----------|----------------------------------|---------------------|-----------------------------------|---------------------|--------------------|---------------------|------|---------------------------------------------|--------|----------|--------------|
| WS20@10  | 5.14                             | 1.5                 | 0.0780                            | 0.2                 | 75.6               | 23.7                | 0.31 | 14483                                       | 1150.1 | 17.0     | 0.0          |
| WS20@11  | 5.07                             | 1.5                 | 0.0786                            | 0.4                 | 75.4               | 19.6                | 0.26 | 14783                                       | 1164.3 | 17.6     | 0.0          |
| WS20@12  | 5.11                             | 1.5                 | 0.0785                            | 0.2                 | 71.2               | 23.1                | 0.33 | 14086                                       | 1154.4 | 17.1     | 0.0          |
| WS20@13  | 5.04                             | 1.5                 | 0.0795                            | 0.3                 | 74.1               | 18.8                | 0.25 | 15285                                       | 1168.8 | 17.5     | 0.1          |
| WS20@14  | 5.10                             | 1.5                 | 0.0789                            | 0.5                 | 73.0               | 23.0                | 0.32 | 15043                                       | 1157.7 | 17.4     | 0.1          |
| WS20@15  | 5.04                             | 1.5                 | 0.0798                            | 0.3                 | 79.0               | 17.2                | 0.22 | 15774                                       | 1168.3 | 17.4     | 0.1          |
| WS20@16  | 4.91                             | 1.5                 | 0.0955                            | 0.2                 | 73.7               | 18.0                | 0.24 | 15646                                       | 1175.6 | 17.5     | 2.2          |
| wills@1  | 5.66                             | 1.9                 | 0.0789                            | 2.8                 | 1.6                | 2.4                 | 1.45 | 15878                                       | 1046.8 | 19.6     | 0.7          |
| wills@2  | 5.37                             | 1.8                 | 0.1223                            | 1.6                 | 1.7                | 2.4                 | 1.45 | 15818                                       | 1040.5 | 18.6     | 6.4          |
| wills@3  | 5.79                             | 1.7                 | 0.0783                            | 2.1                 | 1.7                | 2.4                 | 1.47 | 15536                                       | 1024.7 | 17.0     | 0.6          |
| wills@4  | 5.63                             | 2.2                 | 0.0817                            | 1.6                 | 1.5                | 1.9                 | 1.29 | 15917                                       | 1048.4 | 22.3     | 1.1          |
| wills@5  | 5.66                             | 1.7                 | 0.0755                            | 1.7                 | 1.6                | 2.2                 | 1.39 | 15277                                       | 1050.9 | 17.0     | 0.3          |
| wills@6  | 5.76                             | 1.6                 | 0.0775                            | 0.6                 | 1.7                | 2.7                 | 1.55 | 14785                                       | 1029.9 | 15.9     | 0.5          |
| wills@7  | 5.58                             | 1.8                 | 0.0822                            | 2.8                 | 1.2                | 1.8                 | 1.44 | 13587                                       | 1056.5 | 19.0     | 1.2          |
| wills@8  | 5.61                             | 2.5                 | 0.0796                            | 2.4                 | 1.3                | 2.0                 | 1.46 | 13436                                       | 1054.3 | 25.3     | 0.8          |
| wills@9  | 5.68                             | 1.7                 | 0.0818                            | 1.1                 | 1.4                | 2.0                 | 1.44 | 13682                                       | 1038.8 | 17.6     | 1.1          |
| wills@10 | 5.54                             | 1.8                 | 0.0781                            | 2.8                 | 1.3                | 2.0                 | 1.50 | 13036                                       | 1069.5 | 18.4     | 0.6          |
| wills@11 | 5.75                             | 1.9                 | 0.0787                            | 1.4                 | 1.6                | 2.3                 | 1.46 | 16826                                       | 1031.0 | 20.6     | 0.7          |
| wills@12 | 5.73                             | 1.7                 | 0.0756                            | 2.0                 | 1.5                | 2.1                 | 1.40 | 17518                                       | 1037.7 | 18.9     | 0.2          |
| wills@13 | 5.63                             | 1.6                 | 0.0817                            | 2.9                 | 1.5                | 2.3                 | 1.50 | 15108                                       | 1047.1 | 19.8     | 1.0          |
| wills@14 | 5.66                             | 1.6                 | 0.0799                            | 2.0                 | 1.1                | 1.4                 | 1.28 | 18434                                       | 1044.8 | 18.2     | 0.8          |
| wills@15 | 5.56                             | 1.5                 | 0.0811                            | 1.8                 | 1.5                | 2.2                 | 1.45 | 17185                                       | 1060.5 | 17.6     | 0.8          |
| wills@16 | 5.76                             | 2.2                 | 0.0813                            | 3.0                 | 1.5                | 1.7                 | 1.13 | 17737                                       | 1025.8 | 24.6     | 1.0          |

| Name      | $^{238}\text{U}/^{206}\text{Pb}$ | error(1 $\sigma$ %) | $^{207}\text{Pb}/^{206}\text{Pb}$ | error(1 $\sigma$ %) | U/ $\mu\text{g/g}$ | Th/ $\mu\text{g/g}$ | Th/U | Age/Ma | error/Ma | $f_{206}/\%$ |
|-----------|----------------------------------|---------------------|-----------------------------------|---------------------|--------------------|---------------------|------|--------|----------|--------------|
| ZBL03B@25 | 383                              | 2.4                 | 0.0494                            | 1.2                 | 28.9               | 0.8                 | 0.03 | 16.8   | 0.4      | 0.4          |
| ZBL03B@26 | 379                              | 2.5                 | 0.0602                            | 5.3                 | 23.3               | 0.3                 | 0.01 | 16.7   | 0.5      | 1.8          |
| ZBL03B@27 | 384                              | 2.4                 | 0.0478                            | 2.5                 | 36.8               | 0.3                 | 0.01 | 16.8   | 0.4      | 0.2          |
| ZBL03B@28 | 381                              | 2.4                 | 0.0485                            | 2.1                 | 33.1               | 0.4                 | 0.01 | 16.9   | 0.4      | 0.3          |
| ZBL03B@29 | 377                              | 2.3                 | 0.0587                            | 2.7                 | 12.5               | 0.3                 | 0.02 | 16.9   | 0.4      | 1.6          |
| ZBL03B@30 | 385                              | 2.3                 | 0.0510                            | 2.7                 | 21.5               | 0.4                 | 0.02 | 16.7   | 0.4      | 0.6          |
| ZBL03B@31 | 374                              | 2.3                 | 0.0463                            | 0.8                 | 23.2               | 0.4                 | 0.02 | 17.3   | 0.4      | 0.04         |
| ZBL03B@33 | 360                              | 2.4                 | 0.0507                            | 0.6                 | 18.5               | 0.3                 | 0.02 | 17.8   | 0.4      | 0.6          |
| ZBL03B@34 | 373                              | 2.5                 | 0.0486                            | 1.7                 | 11.5               | 0.3                 | 0.03 | 17.3   | 0.5      | 0.3          |
| ZBL03B@35 | 373                              | 2.5                 | 0.0492                            | 1.9                 | 14.8               | 0.5                 | 0.03 | 17.2   | 0.4      | 0.4          |
| ZBL03B@36 | 380                              | 2.6                 | 0.0516                            | 1.7                 | 13.4               | 0.4                 | 0.03 | 16.9   | 0.5      | 0.7          |
| ZBL03B@37 | 375                              | 2.4                 | 0.0489                            | 1.1                 | 12.8               | 0.2                 | 0.02 | 17.2   | 0.4      | 0.4          |
| ZBL03B@38 | 371                              | 2.5                 | 0.0519                            | 1.4                 | 13.6               | 0.2                 | 0.02 | 17.3   | 0.5      | 0.7          |
| ZBL03B@39 | 384                              | 2.4                 | 0.0489                            | 1.3                 | 18.9               | 0.7                 | 0.04 | 16.8   | 0.4      | 0.4          |
| ZBL03B@40 | 387                              | 2.5                 | 0.0499                            | 2.7                 | 13.3               | 0.7                 | 0.05 | 16.6   | 0.4      | 0.5          |
| ZBL03B@41 | 379                              | 2.5                 | 0.0600                            | 2.8                 | 11.6               | 0.2                 | 0.01 | 16.7   | 0.5      | 1.8          |
| ZBL03B@42 | 366                              | 2.6                 | 0.0509                            | 2.6                 | 19.4               | 0.2                 | 0.01 | 17.6   | 0.5      | 0.6          |
| ZBL03B@43 | 189                              | 4.7                 | 0.4474                            | 3.3                 | 15.3               | 0.3                 | 0.02 | 16.8   | 1.4      | 50.6         |
| ZBL03B@44 | 374                              | 2.5                 | 0.0623                            | 4.9                 | 17.2               | 0.4                 | 0.02 | 16.9   | 0.5      | 2.0          |
| ZBL03B@45 | 375                              | 2.4                 | 0.0468                            | 1.6                 | 24.6               | 0.5                 | 0.02 | 17.2   | 0.4      | 0.1          |
