# Supplementary material for: U–Pb dating of andradite-rich garnet by SIMS
Source: Royal Society of Chemistry journal article supplement (doi:10.1039/d1ja00384d), 2022-01-01
Supplement: d1ja00384d2.pdf [file d1ja00384d2.pdf]

| Sample      | SiO <sub>2</sub> /% | TiO <sub>2</sub> /% | Al <sub>2</sub> O <sub>3</sub> /% | FeO/% | MnO/% | MgO/% | CaO/% | Total | Adr  | Grs  | Sps+Prp |
|-------------|---------------------|---------------------|-----------------------------------|-------|-------|-------|-------|-------|------|------|---------|
| WS20-1      | 32.2                | 8.1                 | 1.5                               | 21.2  | 0.6   | 0.7   | 32.0  | 96.2  | 89.6 | 4.7  | 5.7     |
| WS20-2      | 31.4                | 8.8                 | 1.1                               | 21.1  | 0.6   | 0.7   | 31.7  | 95.4  | 92.0 | 1.8  | 6.2     |
| WS20-3      | 32.3                | 8.0                 | 1.7                               | 21.2  | 0.4   | 0.7   | 32.3  | 96.6  | 88.5 | 6.1  | 5.5     |
| WS20-4      | 32.4                | 7.4                 | 1.1                               | 22.2  | 0.6   | 0.5   | 32.1  | 96.3  | 92.1 | 2.9  | 5.0     |
| IR18-01     | 27.4                | 17.3                | 1.1                               | 17.9  | 0.4   | 1.0   | 31.6  | 96.8  | 91.2 | 0.6  | 8.3     |
| IR18-02     | 26.9                | 17.0                | 1.1                               | 17.8  | 0.5   | 1.1   | 31.5  | 95.8  | 91.3 | 0.0  | 8.7     |
| IR18-03     | 27.6                | 17.0                | 1.1                               | 17.9  | 0.4   | 1.1   | 31.5  | 96.8  | 91.2 | 0.1  | 8.8     |
| IR18-04     | 27.4                | 17.1                | 1.1                               | 17.6  | 0.5   | 1.0   | 31.5  | 96.2  | 91.0 | 0.5  | 8.5     |
| 43(B6)-01   | 27.6                | 16.3                | 2.2                               | 18.3  | 0.4   | 1.0   | 31.8  | 97.6  | 84.3 | 8.0  | 7.6     |
| 43(B6)-02   | 27.0                | 16.8                | 2.2                               | 17.9  | 0.4   | 1.0   | 31.7  | 97.0  | 83.9 | 8.4  | 7.8     |
| 43(B6)-03   | 29.7                | 12.0                | 1.3                               | 20.5  | 0.5   | 0.8   | 31.6  | 96.3  | 90.4 | 3.2  | 6.3     |
| 43(B6)-04   | 29.7                | 11.6                | 1.4                               | 20.7  | 0.4   | 0.8   | 31.6  | 96.3  | 90.0 | 3.9  | 6.1     |
| 15MC-01     | 34.8                | 2.8                 | 2.0                               | 23.4  | 0.3   | 0.5   | 33.4  | 97.2  | 87.4 | 9.2  | 3.4     |
| 15MC-02     | 34.9                | 3.0                 | 2.0                               | 23.6  | 0.3   | 0.5   | 33.5  | 97.8  | 87.7 | 8.9  | 3.4     |
| 15MC-03     | 34.1                | 4.6                 | 2.0                               | 22.3  | 0.3   | 0.7   | 33.5  | 97.6  | 87.2 | 7.9  | 4.9     |
| 15MC-04     | 34.2                | 4.8                 | 2.0                               | 22.2  | 0.4   | 0.8   | 33.3  | 97.6  | 87.4 | 7.4  | 5.2     |
| Willsboro-1 | 36.4                | 0.1                 | 3.0                               | 24.3  | 0.1   | 0.1   | 33.7  | 97.6  | 82.0 | 17.4 | 0.6     |
| Willsboro-2 | 36.1                | 0.2                 | 3.0                               | 24.3  | 0.1   | 0.1   | 33.6  | 97.4  | 81.9 | 17.4 | 0.7     |
| Willsboro-3 | 36.3                | 0.2                 | 3.0                               | 24.4  | 0.1   | 0.1   | 33.5  | 97.5  | 81.8 | 17.6 | 0.6     |
| Willsboro-4 | 36.4                | 0.1                 | 3.1                               | 24.3  | 0.1   | 0.1   | 33.7  | 97.7  | 81.7 | 17.8 | 0.6     |
| Mali-1      | 37.5                | 1.2                 | 8.0                               | 16.6  | 0.2   | 0.5   | 34.8  | 98.9  | 55.3 | 41.8 | 2.8     |

|        |        |        |         |       |       |       |       |       |      |      |         |
|--------|--------|--------|---------|-------|-------|-------|-------|-------|------|------|---------|
| Mali-2 | 36.6   | 1.4    | 8.3     | 16.0  | 0.3   | 0.4   | 34.7  | 97.7  | 54.1 | 43.1 | 2.8     |
| Mali-3 | 37.2   | 1.2    | 7.9     | 16.7  | 0.2   | 0.4   | 34.7  | 98.3  | 56.0 | 41.4 | 2.5     |
| Mali-4 | 37.3   | 1.2    | 8.0     | 16.4  | 0.2   | 0.5   | 34.9  | 98.5  | 55.6 | 41.5 | 2.9     |
| ZBL01  | 37.4   | 0.2    | 5.1     | 21.2  | 0.2   | 0.1   | 34.2  | 98.4  | 70.6 | 28.4 | 1.0     |
| Sample | SiO2/% | TiO2/% | Al2O3/% | FeO/% | MnO/% | MgO/% | CaO/% | Total | Adr  | Grs  | Sps+Prp |
| ZBL02  | 36.7   | 0.0    | 1.1     | 26.9  | 0.1   | 0.0   | 33.7  | 98.6  | 93.3 | 6.0  | 0.6     |
| ZBL03  | 36.7   | 0.1    | 1.8     | 26.0  | 0.4   | 0.0   | 33.8  | 98.7  | 88.9 | 10.0 | 1.1     |
| ZBL04  | 36.8   | 0.1    | 2.4     | 25.2  | 0.3   | 0.0   | 34.0  | 98.9  | 85.7 | 13.4 | 1.0     |
| ZBL05  | 37.3   | 0.0    | 4.1     | 22.8  | 0.3   | 0.0   | 34.4  | 99.0  | 76.0 | 23.1 | 0.8     |
| ZBL06  | 36.8   | 0.3    | 2.0     | 25.4  | 0.1   | 0.1   | 34.0  | 98.7  | 87.8 | 11.2 | 0.9     |
| ZBL07  | 36.6   | 0.0    | 1.4     | 26.6  | 0.2   | 0.1   | 33.8  | 98.7  | 91.3 | 7.8  | 0.9     |
| ZBL08  | 36.3   | 0.0    | 1.3     | 26.4  | 0.2   | 0.1   | 33.7  | 98.0  | 92.3 | 6.8  | 0.9     |
| ZBL09  | 36.5   | 0.0    | 1.2     | 26.5  | 0.2   | 0.1   | 33.8  | 98.4  | 92.4 | 6.5  | 1.0     |
| ZBL10  | 36.6   | 0.0    | 1.1     | 26.5  | 0.2   | 0.1   | 33.7  | 98.2  | 92.9 | 6.2  | 0.9     |
| ZBL11  | 36.5   | 0.0    | 1.0     | 27.1  | 0.1   | 0.1   | 33.8  | 98.6  | 94.1 | 5.1  | 0.8     |
| ZBL12  | 36.3   | 0.0    | 0.9     | 27.0  | 0.1   | 0.1   | 33.9  | 98.4  | 94.2 | 5.1  | 0.7     |
| ZBL13  | 36.6   | 0.0    | 1.0     | 27.1  | 0.1   | 0.1   | 33.8  | 98.7  | 94.1 | 5.1  | 0.8     |
| ZBL14  | 36.4   | 0.0    | 1.0     | 27.2  | 0.2   | 0.1   | 33.7  | 98.5  | 94.1 | 5.0  | 0.9     |
| ZBL15  | 36.4   | 0.0    | 0.9     | 27.3  | 0.1   | 0.1   | 33.8  | 98.5  | 94.7 | 4.6  | 0.7     |
| ZBL16  | 36.5   | 0.0    | 0.8     | 27.1  | 0.2   | 0.1   | 33.8  | 98.5  | 94.9 | 4.2  | 0.9     |
| ZBL17  | 36.3   | 0.0    | 0.8     | 27.2  | 0.2   | 0.1   | 33.7  | 98.3  | 95.2 | 3.9  | 0.9     |
| ZBL18  | 36.7   | 0.0    | 1.5     | 26.3  | 0.2   | 0.1   | 33.8  | 98.5  | 91.0 | 8.1  | 0.8     |
| ZBL19  | 36.7   | 0.0    | 1.5     | 26.2  | 0.2   | 0.1   | 33.9  | 98.6  | 90.9 | 8.2  | 0.9     |
| ZBL20  | 36.7   | 0.0    | 1.3     | 26.7  | 0.2   | 0.1   | 33.9  | 98.8  | 92.1 | 7.0  | 0.9     |
| ZBL21  | 36.4   | 0.0    | 0.9     | 27.1  | 0.1   | 0.1   | 33.8  | 98.5  | 94.3 | 5.0  | 0.7     |
| ZBL22  | 36.7   | 0.0    | 1.0     | 27.0  | 0.1   | 0.1   | 33.8  | 98.6  | 94.0 | 5.2  | 0.7     |

|        |        |        |         |       |       |       |       |       |      |      |         |
|--------|--------|--------|---------|-------|-------|-------|-------|-------|------|------|---------|
| ZBL23  | 36.4   | 0.0    | 1.1     | 27.0  | 0.2   | 0.1   | 33.6  | 98.4  | 93.3 | 5.8  | 0.9     |
| ZBL24  | 36.6   | 0.0    | 0.9     | 27.1  | 0.1   | 0.1   | 33.7  | 98.5  | 94.4 | 5.0  | 0.7     |
| ZBL25  | 36.6   | 0.0    | 0.9     | 27.0  | 0.2   | 0.1   | 33.7  | 98.6  | 94.5 | 4.6  | 0.9     |
| ZBL26  | 36.5   | 0.0    | 0.8     | 27.2  | 0.1   | 0.1   | 33.7  | 98.4  | 95.3 | 4.2  | 0.6     |
| Sample | SiO2/% | TiO2/% | Al2O3/% | FeO/% | MnO/% | MgO/% | CaO/% | Total | Adr  | Grs  | Sps+Prp |
| ZBL27  | 36.4   | 0.0    | 0.8     | 27.1  | 0.2   | 0.1   | 33.6  | 98.2  | 95.2 | 3.9  | 0.9     |
| ZBL28  | 36.7   | 0.0    | 0.9     | 27.1  | 0.1   | 0.1   | 33.6  | 98.6  | 94.5 | 4.7  | 0.8     |
| ZBL29  | 36.7   | 0.0    | 1.2     | 26.7  | 0.2   | 0.1   | 33.8  | 98.7  | 92.6 | 6.6  | 0.8     |
| ZBL30  | 36.6   | 0.0    | 0.9     | 26.9  | 0.2   | 0.1   | 33.7  | 98.4  | 94.2 | 4.9  | 0.9     |
| ZBL31  | 36.4   | 1.4    | 2.0     | 24.4  | 0.2   | 0.1   | 34.0  | 98.5  | 87.5 | 11.4 | 1.1     |
| ZBL32  | 36.9   | 0.1    | 2.5     | 24.7  | 0.3   | 0.0   | 33.9  | 98.4  | 85.1 | 13.9 | 1.0     |
| ZBL33  | 37.6   | 0.2    | 6.3     | 19.4  | 0.2   | 0.1   | 34.7  | 98.5  | 64.2 | 34.9 | 0.9     |
| ZBL34  | 37.3   | 0.4    | 6.2     | 19.4  | 0.3   | 0.1   | 34.5  | 98.1  | 64.5 | 34.4 | 1.1     |
| ZBL35  | 36.8   | 0.0    | 1.1     | 26.9  | 0.2   | 0.1   | 33.8  | 98.9  | 93.1 | 6.2  | 0.7     |
| ZBL36  | 36.7   | 0.0    | 1.6     | 26.0  | 0.2   | 0.1   | 33.9  | 98.4  | 90.4 | 8.8  | 0.8     |
| ZBL37  | 36.3   | 0.0    | 1.8     | 25.9  | 0.2   | 0.1   | 33.7  | 98.0  | 89.3 | 9.8  | 0.9     |
| ZBL38  | 36.7   | 0.2    | 2.1     | 25.4  | 0.2   | 0.0   | 33.9  | 98.5  | 87.1 | 12.2 | 0.7     |
| ZBL39  | 36.7   | 0.1    | 2.1     | 25.5  | 0.2   | 0.1   | 34.0  | 98.7  | 87.4 | 11.7 | 0.8     |
| ZBL40  | 36.8   | 0.2    | 2.1     | 25.3  | 0.2   | 0.1   | 34.0  | 98.7  | 87.1 | 12.1 | 0.8     |
| ZBL41  | 36.9   | 0.1    | 2.1     | 25.3  | 0.2   | 0.1   | 34.1  | 98.7  | 87.6 | 11.6 | 0.8     |
| ZBL42  | 36.9   | 0.1    | 1.8     | 25.6  | 0.1   | 0.1   | 34.0  | 98.6  | 88.8 | 10.4 | 0.8     |
| ZBL43  | 36.8   | 0.1    | 1.8     | 25.9  | 0.1   | 0.1   | 33.7  | 98.5  | 88.9 | 10.3 | 0.8     |
| ZBL44  | 36.7   | 0.1    | 1.8     | 25.9  | 0.1   | 0.1   | 33.9  | 98.6  | 89.1 | 10.3 | 0.6     |
| ZBL45  | 36.7   | 0.1    | 1.9     | 26.0  | 0.2   | 0.1   | 33.8  | 98.8  | 88.8 | 10.3 | 0.9     |
| ZBL46  | 36.8   | 0.1    | 1.8     | 25.9  | 0.2   | 0.1   | 33.9  | 98.7  | 88.9 | 10.3 | 0.8     |
| ZBL47  | 36.8   | 0.1    | 1.8     | 25.6  | 0.1   | 0.1   | 34.0  | 98.5  | 88.9 | 10.4 | 0.8     |

|        |        |        |         |       |       |       |       |       |       |      |         |
|--------|--------|--------|---------|-------|-------|-------|-------|-------|-------|------|---------|
| ZBL48  | 36.8   | 0.1    | 1.8     | 25.9  | 0.2   | 0.1   | 33.9  | 98.8  | 89.1  | 10.0 | 0.9     |
| ZBL49  | 36.6   | 0.1    | 1.8     | 25.9  | 0.2   | 0.1   | 34.0  | 98.8  | 89.0  | 10.1 | 0.9     |
| ZBL50  | 36.8   | 0.1    | 1.8     | 25.8  | 0.2   | 0.1   | 33.9  | 98.7  | 89.0  | 10.1 | 0.9     |
| ZBL51  | 36.8   | 0.1    | 1.9     | 25.8  | 0.2   | 0.1   | 33.8  | 98.7  | 88.7  | 10.5 | 0.8     |
| Sample | SiO2/% | TiO2/% | Al2O3/% | FeO/% | MnO/% | MgO/% | CaO/% | Total | Adr   | Grs  | Sps+Prp |
| ZBL52  | 36.8   | 0.1    | 1.8     | 25.9  | 0.2   | 0.1   | 33.9  | 98.8  | 88.9  | 10.1 | 0.9     |
| ZBL53  | 36.7   | 0.1    | 1.8     | 25.9  | 0.2   | 0.1   | 34.0  | 98.7  | 89.1  | 10.1 | 0.8     |
| ZBL54  | 36.7   | 0.1    | 1.8     | 26.0  | 0.2   | 0.1   | 34.0  | 98.9  | 89.0  | 10.2 | 0.9     |
| ZBL55  | 36.7   | 0.1    | 1.8     | 25.5  | 0.2   | 0.1   | 33.9  | 98.4  | 88.9  | 10.3 | 0.8     |
| ZBL56  | 35.1   | 0.0    | 0.1     | 28.7  | 0.2   | 0.0   | 33.1  | 97.3  | 99.3  | 0.0  | 0.7     |
| ZBL57  | 35.7   | 0.0    | 0.0     | 28.6  | 0.2   | 0.0   | 33.1  | 97.7  | 99.8  | 0.0  | 0.2     |
| ZBL58  | 35.1   | 0.0    | 0.0     | 28.7  | 0.2   | 0.0   | 32.9  | 97.0  | 99.7  | 0.0  | 0.3     |
| ZBL59  | 35.5   | 0.0    | 0.0     | 28.4  | 0.2   | 0.0   | 33.1  | 97.3  | 99.7  | 0.0  | 0.3     |
| ZBL60  | 36.2   | 0.0    | 0.1     | 28.6  | 0.2   | 0.0   | 33.4  | 98.5  | 99.5  | 0.0  | 0.5     |
| ZBL61  | 36.1   | 0.0    | 0.1     | 28.4  | 0.2   | 0.0   | 33.2  | 98.1  | 99.4  | 0.0  | 0.6     |
| ZBL62  | 36.3   | 0.0    | 0.0     | 28.9  | 0.2   | 0.0   | 33.3  | 98.8  | 100.0 | 0.0  | 0.0     |
| ZBL63  | 36.0   | 0.0    | 0.2     | 28.3  | 0.2   | 0.0   | 33.1  | 98.0  | 98.7  | 0.4  | 0.8     |
| ZBL64  | 36.1   | 0.0    | 0.2     | 28.5  | 0.2   | 0.0   | 33.2  | 98.1  | 98.8  | 0.5  | 0.7     |
| ZBL65  | 36.0   | 0.0    | 0.1     | 28.4  | 0.2   | 0.0   | 33.3  | 98.0  | 99.3  | 0.0  | 0.7     |
| ZBL66  | 36.1   | 0.0    | 0.0     | 28.8  | 0.2   | 0.1   | 33.0  | 98.2  | 99.9  | 0.0  | 0.1     |
| ZBL67  | 36.1   | 0.0    | 0.0     | 28.5  | 0.2   | 0.0   | 33.1  | 98.0  | 99.9  | 0.0  | 0.1     |
| ZBL68  | 35.9   | 0.0    | 0.0     | 28.6  | 0.2   | 0.1   | 33.2  | 97.9  | 100.0 | 0.0  | 0.0     |
| ZBL69  | 36.1   | 0.0    | 0.0     | 28.5  | 0.2   | 0.0   | 33.2  | 98.2  | 99.9  | 0.0  | 0.1     |
| ZBL70  | 35.9   | 0.0    | 0.0     | 28.5  | 0.3   | 0.0   | 33.1  | 97.8  | 100.0 | 0.0  | 0.0     |
| ZBL71  | 36.2   | 0.0    | 0.0     | 28.5  | 0.3   | 0.1   | 33.2  | 98.2  | 100.0 | 0.0  | 0.0     |
| ZBL72  | 36.1   | 0.0    | 0.0     | 28.5  | 0.2   | 0.1   | 33.2  | 98.2  | 99.9  | 0.0  | 0.1     |

|        |        |        |         |       |       |       |       |       |       |     |         |
|--------|--------|--------|---------|-------|-------|-------|-------|-------|-------|-----|---------|
| ZBL73  | 36.3   | 0.0    | 0.0     | 28.5  | 0.2   | 0.0   | 33.3  | 98.5  | 99.9  | 0.0 | 0.1     |
| ZBL74  | 36.1   | 0.0    | 0.0     | 28.6  | 0.2   | 0.0   | 33.1  | 98.2  | 99.9  | 0.0 | 0.1     |
| ZBL75  | 36.2   | 0.0    | 0.0     | 28.4  | 0.2   | 0.0   | 33.3  | 98.1  | 100.0 | 0.0 | 0.0     |
| ZBL76  | 36.1   | 0.0    | 0.0     | 28.5  | 0.2   | 0.1   | 33.1  | 97.9  | 100.0 | 0.0 | 0.0     |
| Sample | SiO2/% | TiO2/% | Al2O3/% | FeO/% | MnO/% | MgO/% | CaO/% | Total | Adr   | Grs | Sps+Prp |
| ZBL77  | 36.0   | 0.0    | 0.0     | 28.6  | 0.2   | 0.0   | 33.3  | 98.1  | 99.9  | 0.0 | 0.1     |
| ZBL78  | 35.8   | 0.0    | 0.0     | 28.7  | 0.2   | 0.0   | 33.2  | 98.0  | 99.9  | 0.0 | 0.1     |
| ZBL79  | 35.9   | 0.0    | 0.0     | 28.6  | 0.2   | 0.0   | 33.2  | 98.0  | 100.0 | 0.0 | 0.0     |
| ZBL80  | 35.9   | 0.0    | 0.0     | 28.7  | 0.2   | 0.0   | 32.9  | 97.8  | 100.0 | 0.0 | 0.0     |
| ZBL81  | 36.1   | 0.0    | 0.0     | 28.5  | 0.3   | 0.0   | 33.1  | 98.0  | 100.0 | 0.0 | 0.0     |
| ZBL82  | 36.2   | 0.0    | 0.0     | 28.7  | 0.2   | 0.0   | 33.0  | 98.2  | 99.9  | 0.0 | 0.1     |
| ZBL83  | 35.9   | 0.0    | 0.0     | 28.6  | 0.2   | 0.1   | 32.8  | 97.6  | 99.9  | 0.0 | 0.1     |
| ZBL84  | 33.4   | 0.0    | 0.0     | 28.5  | 0.3   | 0.0   | 32.7  | 94.9  | 99.9  | 0.0 | 0.1     |
| ZBL85  | 34.6   | 0.0    | 0.0     | 28.7  | 0.3   | 0.1   | 32.8  | 96.4  | 99.9  | 0.0 | 0.1     |
| ZBL86  | 34.8   | 0.0    | 0.0     | 28.5  | 0.2   | 0.0   | 32.9  | 96.5  | 99.9  | 0.0 | 0.1     |
| ZBL87  | 34.8   | 0.0    | 0.0     | 28.5  | 0.3   | 0.1   | 32.7  | 96.3  | 99.9  | 0.0 | 0.1     |
| ZBL88  | 35.7   | 0.0    | 0.0     | 28.6  | 0.2   | 0.0   | 32.9  | 97.6  | 99.9  | 0.0 | 0.1     |
| ZBL89  | 35.9   | 0.0    | 0.0     | 28.8  | 0.3   | 0.1   | 32.8  | 97.9  | 99.9  | 0.0 | 0.1     |
| ZBL90  | 36.2   | 0.0    | 0.0     | 28.7  | 0.2   | 0.0   | 33.0  | 98.2  | 99.9  | 0.0 | 0.1     |
| ZBL91  | 36.4   | 0.0    | 0.0     | 28.5  | 0.2   | 0.0   | 32.9  | 98.1  | 99.9  | 0.0 | 0.1     |
| ZBL92  | 36.1   | 0.0    | 0.0     | 28.9  | 0.2   | 0.0   | 32.9  | 98.2  | 99.9  | 0.0 | 0.1     |
| ZBL93  | 36.1   | 0.0    | 0.0     | 28.6  | 0.2   | 0.0   | 32.9  | 97.9  | 99.9  | 0.0 | 0.1     |
| ZBL94  | 36.2   | 0.0    | 0.0     | 28.7  | 0.2   | 0.0   | 33.0  | 98.2  | 99.9  | 0.0 | 0.1     |
| ZBL95  | 36.1   | 0.0    | 0.0     | 28.7  | 0.2   | 0.1   | 32.9  | 98.1  | 99.9  | 0.0 | 0.1     |
| ZBL96  | 36.0   | 0.0    | 0.1     | 28.3  | 0.2   | 0.0   | 33.1  | 97.8  | 99.4  | 0.0 | 0.6     |
| ZBL97  | 36.3   | 0.0    | 0.1     | 28.7  | 0.2   | 0.0   | 32.9  | 98.3  | 99.3  | 0.0 | 0.7     |

|        |        |        |         |       |       |       |       |       |       |     |         |
|--------|--------|--------|---------|-------|-------|-------|-------|-------|-------|-----|---------|
| ZBL98  | 36.3   | 0.0    | 0.2     | 28.4  | 0.2   | 0.0   | 33.0  | 98.2  | 98.9  | 0.2 | 0.9     |
| ZBL99  | 36.3   | 0.0    | 0.5     | 28.0  | 0.2   | 0.0   | 32.9  | 98.0  | 96.8  | 2.3 | 0.9     |
| ZBL100 | 36.3   | 0.0    | 0.0     | 28.9  | 0.3   | 0.0   | 33.0  | 98.6  | 99.9  | 0.0 | 0.1     |
| ZBL101 | 36.3   | 0.0    | 0.0     | 28.9  | 0.2   | 0.0   | 33.0  | 98.5  | 99.9  | 0.0 | 0.1     |
| Sample | SiO2/% | TiO2/% | Al2O3/% | FeO/% | MnO/% | MgO/% | CaO/% | Total | Adr   | Grs | Sps+Prp |
| ZBL102 | 36.1   | 0.0    | 0.0     | 28.8  | 0.2   | 0.0   | 33.1  | 98.2  | 99.9  | 0.0 | 0.1     |
| ZBL103 | 36.3   | 0.0    | 0.0     | 28.8  | 0.3   | 0.0   | 33.1  | 98.5  | 99.9  | 0.0 | 0.1     |
| ZBL104 | 36.1   | 0.0    | 0.0     | 28.4  | 0.3   | 0.0   | 33.1  | 97.9  | 99.9  | 0.0 | 0.1     |
| ZBL105 | 36.2   | 0.0    | 0.0     | 28.7  | 0.2   | 0.0   | 33.0  | 98.3  | 100.0 | 0.0 | 0.0     |
| ZBL106 | 36.3   | 0.0    | 0.0     | 28.5  | 0.2   | 0.0   | 33.1  | 98.1  | 99.9  | 0.0 | 0.1     |
| ZBL107 | 36.1   | 0.0    | 0.0     | 28.7  | 0.2   | 0.0   | 33.0  | 98.1  | 99.9  | 0.0 | 0.1     |
| ZBL108 | 36.0   | 0.0    | 0.0     | 28.5  | 0.2   | 0.1   | 33.0  | 97.8  | 99.9  | 0.0 | 0.1     |
| ZBL109 | 36.3   | 0.0    | 0.0     | 28.6  | 0.3   | 0.0   | 33.2  | 98.3  | 99.9  | 0.0 | 0.1     |
| ZBL110 | 36.3   | 0.0    | 0.0     | 28.6  | 0.3   | 0.0   | 33.0  | 98.3  | 99.9  | 0.0 | 0.1     |
| ZBL111 | 36.3   | 0.0    | 0.0     | 28.5  | 0.2   | 0.0   | 33.0  | 98.1  | 99.9  | 0.0 | 0.1     |
| ZBL112 | 35.9   | 0.0    | 0.0     | 28.6  | 0.2   | 0.1   | 33.1  | 98.0  | 100.0 | 0.0 | 0.0     |
| ZBL113 | 36.2   | 0.0    | 0.0     | 28.8  | 0.2   | 0.0   | 33.1  | 98.4  | 99.8  | 0.0 | 0.2     |
| ZBL114 | 36.1   | 0.0    | 0.0     | 28.8  | 0.2   | 0.0   | 33.2  | 98.4  | 99.9  | 0.0 | 0.1     |
| ZBL115 | 36.2   | 0.0    | 0.0     | 28.4  | 0.2   | 0.0   | 33.1  | 98.0  | 100.0 | 0.0 | 0.0     |
| ZBL116 | 36.1   | 0.0    | 0.0     | 28.5  | 0.2   | 0.0   | 33.2  | 98.1  | 99.9  | 0.0 | 0.1     |
| ZBL117 | 36.3   | 0.0    | 0.0     | 28.6  | 0.2   | 0.1   | 33.1  | 98.3  | 99.9  | 0.0 | 0.1     |
| ZBL118 | 36.4   | 0.0    | 0.0     | 28.5  | 0.2   | 0.0   | 33.1  | 98.3  | 99.9  | 0.0 | 0.1     |
| ZBL119 | 36.3   | 0.0    | 0.0     | 28.7  | 0.2   | 0.0   | 33.1  | 98.3  | 99.9  | 0.0 | 0.1     |
| ZBL120 | 36.1   | 0.0    | 0.0     | 28.6  | 0.2   | 0.0   | 33.0  | 98.0  | 99.8  | 0.0 | 0.2     |
| ZBL121 | 36.3   | 0.0    | 0.0     | 28.6  | 0.2   | 0.0   | 33.1  | 98.4  | 99.9  | 0.0 | 0.1     |
| ZBL122 | 35.0   | 0.0    | 0.0     | 28.5  | 0.2   | 0.0   | 33.1  | 96.9  | 99.9  | 0.0 | 0.1     |

|        |        |        |         |       |       |       |       |       |       |     |         |
|--------|--------|--------|---------|-------|-------|-------|-------|-------|-------|-----|---------|
| ZBL123 | 35.0   | 0.0    | 0.0     | 28.5  | 0.2   | 0.0   | 33.0  | 96.7  | 99.9  | 0.0 | 0.1     |
| ZBL124 | 34.8   | 0.0    | 0.0     | 28.4  | 0.2   | 0.0   | 33.1  | 96.6  | 100.0 | 0.0 | 0.0     |
| ZBL125 | 35.2   | 0.0    | 0.0     | 28.6  | 0.3   | 0.0   | 33.1  | 97.2  | 99.9  | 0.0 | 0.1     |
| ZBL126 | 35.1   | 0.0    | 0.1     | 28.4  | 0.2   | 0.1   | 33.0  | 96.8  | 99.6  | 0.0 | 0.4     |
| Sample | SiO2/% | TiO2/% | Al2O3/% | FeO/% | MnO/% | MgO/% | CaO/% | Total | Adr   | Grs | Sps+Prp |
| ZBL127 | 34.9   | 0.0    | 0.5     | 27.7  | 0.3   | 0.0   | 33.2  | 96.6  | 97.0  | 2.1 | 0.9     |
| ZBL128 | 35.5   | 0.0    | 0.4     | 28.2  | 0.2   | 0.0   | 33.2  | 97.5  | 97.7  | 1.4 | 0.9     |
| ZBL129 | 35.2   | 0.0    | 0.1     | 28.6  | 0.2   | 0.0   | 33.1  | 97.3  | 99.4  | 0.0 | 0.6     |
| ZBL130 | 35.1   | 0.0    | 0.1     | 28.2  | 0.3   | 0.0   | 33.0  | 96.8  | 99.1  | 0.0 | 0.9     |
| ZBL131 | 35.6   | 0.0    | 0.2     | 28.3  | 0.2   | 0.0   | 33.3  | 97.5  | 98.8  | 0.3 | 0.8     |
| ZBL132 | 35.5   | 0.0    | 0.2     | 28.4  | 0.3   | 0.0   | 33.2  | 97.6  | 98.8  | 0.3 | 0.9     |
| ZBL133 | 35.6   | 0.0    | 0.5     | 27.9  | 0.2   | 0.0   | 33.1  | 97.4  | 97.1  | 2.0 | 0.9     |
| ZBL134 | 35.8   | 0.0    | 0.5     | 28.0  | 0.2   | 0.0   | 33.2  | 97.7  | 97.1  | 2.0 | 0.8     |
| ZBL135 | 35.4   | 0.0    | 0.1     | 28.3  | 0.2   | 0.0   | 33.1  | 97.3  | 99.3  | 0.0 | 0.7     |
| ZBL136 | 35.7   | 0.0    | 0.0     | 28.4  | 0.2   | 0.0   | 33.1  | 97.5  | 99.9  | 0.0 | 0.1     |
| ZBL137 | 35.9   | 0.0    | 0.0     | 28.7  | 0.2   | 0.0   | 33.1  | 98.0  | 99.9  | 0.0 | 0.1     |
| ZBL138 | 35.8   | 0.0    | 0.0     | 28.6  | 0.2   | 0.1   | 33.0  | 97.6  | 100.0 | 0.0 | 0.0     |
| ZBL139 | 35.6   | 0.0    | 0.4     | 27.9  | 0.3   | 0.0   | 33.3  | 97.5  | 97.6  | 1.5 | 1.0     |
| ZBL140 | 35.6   | 0.0    | 0.2     | 28.2  | 0.2   | 0.1   | 33.2  | 97.5  | 98.5  | 0.4 | 1.0     |
| ZBL141 | 35.3   | 0.0    | 0.1     | 28.4  | 0.3   | 0.1   | 33.1  | 97.3  | 99.5  | 0.0 | 0.5     |
| ZBL142 | 36.3   | 0.0    | 0.2     | 28.2  | 0.2   | 0.0   | 33.4  | 98.4  | 98.8  | 0.2 | 0.9     |
| ZBL143 | 35.8   | 0.0    | 0.2     | 28.4  | 0.2   | 0.0   | 33.2  | 97.8  | 98.9  | 0.4 | 0.7     |
| ZBL144 | 36.1   | 0.0    | 0.2     | 28.6  | 0.2   | 0.1   | 33.2  | 98.4  | 98.9  | 0.1 | 1.0     |
| ZBL145 | 36.3   | 0.0    | 0.9     | 27.5  | 0.3   | 0.0   | 33.5  | 98.4  | 94.6  | 4.5 | 0.9     |
| ZBL146 | 36.4   | 0.1    | 1.2     | 27.1  | 0.3   | 0.0   | 33.6  | 98.8  | 92.7  | 6.3 | 1.0     |
| ZBL147 | 36.0   | 0.0    | 0.1     | 28.7  | 0.2   | 0.0   | 33.1  | 98.3  | 99.1  | 0.0 | 0.8     |

|        |        |        |         |       |       |       |       |       |      |     |         |
|--------|--------|--------|---------|-------|-------|-------|-------|-------|------|-----|---------|
| ZBL148 | 36.2   | 0.0    | 0.1     | 28.1  | 0.3   | 0.1   | 33.4  | 98.1  | 99.1 | 0.0 | 0.9     |
| ZBL149 | 36.3   | 0.0    | 0.5     | 28.1  | 0.2   | 0.1   | 33.4  | 98.6  | 97.1 | 2.0 | 0.9     |
| ZBL150 | 36.4   | 0.0    | 0.5     | 27.7  | 0.2   | 0.0   | 33.4  | 98.3  | 96.9 | 2.3 | 0.8     |
| ZBL151 | 36.4   | 0.1    | 1.2     | 26.9  | 0.2   | 0.0   | 33.6  | 98.6  | 92.5 | 6.7 | 0.8     |
| Sample | SiO2/% | TiO2/% | Al2O3/% | FeO/% | MnO/% | MgO/% | CaO/% | Total | Adr  | Grs | Sps+Prp |
| ZBL152 | 36.5   | 0.0    | 0.9     | 27.4  | 0.2   | 0.0   | 33.5  | 98.5  | 94.5 | 4.8 | 0.7     |
| ZBL153 | 36.0   | 0.0    | 0.2     | 28.3  | 0.2   | 0.0   | 33.4  | 98.2  | 98.9 | 0.2 | 0.9     |
| ZBL154 | 36.3   | 0.0    | 0.2     | 28.3  | 0.3   | 0.0   | 33.3  | 98.3  | 99.0 | 0.0 | 1.0     |
| ZBL155 | 36.3   | 0.0    | 0.2     | 28.4  | 0.2   | 0.0   | 33.4  | 98.5  | 98.9 | 0.2 | 0.9     |
| ZBL156 | 36.2   | 0.0    | 0.4     | 28.0  | 0.2   | 0.0   | 33.4  | 98.3  | 97.4 | 1.7 | 0.9     |
| ZBL157 | 36.5   | 0.1    | 1.3     | 27.0  | 0.2   | 0.0   | 33.6  | 98.8  | 91.9 | 7.1 | 0.9     |
| ZBL158 | 36.5   | 0.0    | 0.8     | 27.7  | 0.2   | 0.0   | 33.5  | 98.7  | 95.2 | 4.0 | 0.7     |
| ZBL159 | 36.1   | 0.0    | 0.6     | 27.8  | 0.2   | 0.0   | 33.3  | 98.1  | 96.3 | 2.8 | 0.9     |
| ZBL160 | 36.0   | 0.0    | 0.3     | 27.8  | 0.2   | 0.0   | 33.2  | 97.6  | 98.0 | 1.1 | 0.9     |
| ZBL161 | 36.0   | 0.0    | 0.1     | 28.4  | 0.2   | 0.0   | 33.3  | 98.1  | 99.3 | 0.0 | 0.7     |
| ZBL162 | 36.1   | 0.0    | 0.1     | 28.3  | 0.2   | 0.1   | 33.1  | 97.9  | 99.4 | 0.0 | 0.6     |
| ZBL163 | 36.2   | 0.0    | 0.1     | 28.6  | 0.3   | 0.0   | 33.1  | 98.3  | 99.5 | 0.0 | 0.5     |
| ZBL164 | 36.4   | 0.0    | 0.1     | 28.7  | 0.3   | 0.0   | 33.4  | 98.9  | 99.6 | 0.0 | 0.4     |
| ZBL165 | 36.3   | 0.0    | 0.1     | 28.2  | 0.3   | 0.0   | 33.3  | 98.3  | 99.5 | 0.0 | 0.5     |
| ZBL166 | 36.3   | 0.0    | 0.1     | 28.3  | 0.3   | 0.0   | 33.3  | 98.4  | 99.5 | 0.0 | 0.5     |
| ZBL167 | 36.3   | 0.0    | 0.1     | 28.4  | 0.3   | 0.0   | 33.4  | 98.5  | 99.5 | 0.0 | 0.5     |
| ZBL168 | 36.3   | 0.0    | 0.1     | 28.5  | 0.3   | 0.0   | 33.4  | 98.6  | 99.5 | 0.0 | 0.5     |
| ZBL169 | 36.4   | 0.0    | 0.1     | 28.3  | 0.3   | 0.0   | 33.5  | 98.7  | 99.3 | 0.0 | 0.7     |
| ZBL170 | 36.1   | 0.0    | 0.1     | 28.2  | 0.3   | 0.0   | 33.2  | 98.0  | 99.4 | 0.0 | 0.6     |
| ZBL171 | 36.2   | 0.0    | 0.1     | 28.2  | 0.2   | 0.0   | 33.3  | 98.1  | 99.3 | 0.0 | 0.7     |
| ZBL172 | 36.1   | 0.0    | 0.1     | 28.6  | 0.2   | 0.0   | 33.4  | 98.5  | 99.4 | 0.0 | 0.6     |



|        |        |        |         |       |       |       |       |       |      |     |         |
|--------|--------|--------|---------|-------|-------|-------|-------|-------|------|-----|---------|
| ZBL173 | 36.3   | 0.0    | 0.1     | 28.4  | 0.3   | 0.0   | 33.3  | 98.4  | 99.5 | 0.0 | 0.5     |
| ZBL174 | 36.3   | 0.0    | 0.1     | 28.5  | 0.2   | 0.0   | 33.3  | 98.5  | 99.5 | 0.0 | 0.5     |
| ZBL175 | 36.4   | 0.0    | 0.1     | 28.3  | 0.3   | 0.0   | 33.1  | 98.3  | 99.4 | 0.0 | 0.6     |
| ZBL176 | 36.3   | 0.0    | 0.1     | 28.6  | 0.2   | 0.0   | 33.5  | 98.7  | 99.4 | 0.0 | 0.6     |
| Sample | SiO2/% | TiO2/% | Al2O3/% | FeO/% | MnO/% | MgO/% | CaO/% | Total | Adr  | Grs | Sps+Prp |
| ZBL177 | 36.2   | 0.0    | 0.1     | 28.2  | 0.2   | 0.0   | 33.2  | 98.0  | 99.4 | 0.0 | 0.6     |
| ZBL178 | 36.3   | 0.0    | 0.1     | 28.4  | 0.3   | 0.1   | 33.2  | 98.3  | 99.3 | 0.0 | 0.7     |
| ZBL179 | 36.2   | 0.0    | 0.1     | 28.2  | 0.2   | 0.0   | 33.1  | 97.9  | 99.5 | 0.0 | 0.5     |
| ZBL180 | 36.2   | 0.0    | 0.1     | 28.1  | 0.2   | 0.0   | 33.3  | 98.0  | 99.2 | 0.0 | 0.8     |
| ZBL181 | 36.3   | 0.0    | 0.1     | 28.2  | 0.3   | 0.0   | 33.3  | 98.3  | 99.2 | 0.0 | 0.8     |
| ZBL182 | 36.0   | 0.0    | 0.1     | 28.3  | 0.2   | 0.0   | 33.2  | 97.9  | 99.1 | 0.2 | 0.7     |
| ZBL183 | 36.0   | 0.0    | 0.1     | 28.8  | 0.3   | 0.0   | 33.1  | 98.4  | 99.2 | 0.0 | 0.8     |
| ZBL184 | 36.0   | 0.0    | 0.1     | 28.4  | 0.2   | 0.0   | 33.2  | 98.0  | 99.2 | 0.1 | 0.7     |
| ZBL185 | 36.3   | 0.0    | 0.2     | 28.4  | 0.2   | 0.0   | 33.2  | 98.4  | 98.8 | 0.4 | 0.8     |
| ZBL186 | 36.3   | 0.0    | 0.2     | 28.3  | 0.2   | 0.0   | 33.3  | 98.5  | 99.0 | 0.0 | 0.9     |
| ZBL187 | 36.3   | 0.0    | 0.1     | 28.4  | 0.3   | 0.0   | 33.2  | 98.3  | 99.1 | 0.0 | 0.9     |
| ZBL188 | 36.2   | 0.0    | 0.2     | 28.4  | 0.2   | 0.0   | 33.3  | 98.3  | 99.0 | 0.1 | 0.9     |
| ZBL189 | 36.3   | 0.0    | 0.1     | 27.9  | 0.3   | 0.0   | 33.3  | 98.0  | 99.1 | 0.0 | 0.9     |
| ZBL190 | 36.2   | 0.0    | 0.2     | 28.4  | 0.2   | 0.0   | 33.3  | 98.4  | 99.0 | 0.1 | 0.9     |
| ZBL191 | 36.2   | 0.0    | 0.2     | 28.5  | 0.2   | 0.0   | 33.4  | 98.6  | 99.0 | 0.1 | 0.9     |
| ZBL192 | 36.3   | 0.0    | 0.2     | 28.3  | 0.3   | 0.1   | 33.3  | 98.4  | 99.0 | 0.0 | 1.0     |
| ZBL193 | 36.2   | 0.0    | 0.2     | 28.2  | 0.2   | 0.0   | 33.3  | 98.1  | 98.8 | 0.5 | 0.7     |
| ZBL194 | 36.1   | 0.0    | 0.2     | 28.0  | 0.2   | 0.0   | 33.3  | 97.9  | 98.8 | 0.3 | 0.9     |
| ZBL195 | 36.3   | 0.0    | 0.2     | 28.4  | 0.2   | 0.0   | 33.2  | 98.4  | 98.5 | 0.7 | 0.8     |
| ZBL196 | 36.2   | 0.0    | 0.2     | 28.3  | 0.3   | 0.0   | 33.3  | 98.5  | 98.5 | 0.6 | 0.9     |
| ZBL197 | 36.1   | 0.0    | 0.1     | 28.3  | 0.2   | 0.0   | 33.2  | 98.0  | 99.5 | 0.0 | 0.5     |

|        |        |        |         |       |       |       |       |       |       |     |         |
|--------|--------|--------|---------|-------|-------|-------|-------|-------|-------|-----|---------|
| ZBL198 | 35.5   | 0.0    | 0.1     | 28.2  | 0.2   | 0.0   | 33.1  | 97.2  | 99.1  | 0.1 | 0.8     |
| ZBL199 | 35.0   | 0.0    | 0.0     | 28.2  | 0.2   | 0.0   | 33.0  | 96.5  | 99.9  | 0.0 | 0.1     |
| ZBL200 | 35.0   | 0.0    | 0.0     | 28.7  | 0.2   | 0.1   | 33.1  | 97.0  | 99.9  | 0.0 | 0.1     |
| ZBL201 | 34.8   | 0.0    | 0.0     | 28.7  | 0.2   | 0.0   | 33.1  | 97.0  | 99.9  | 0.0 | 0.1     |
| Sample | SiO2/% | TiO2/% | Al2O3/% | FeO/% | MnO/% | MgO/% | CaO/% | Total | Adr   | Grs | Sps+Prp |
| ZBL202 | 34.9   | 0.0    | 0.0     | 28.5  | 0.2   | 0.0   | 33.0  | 96.7  | 99.9  | 0.0 | 0.1     |
| ZBL203 | 34.7   | 0.0    | 0.0     | 28.4  | 0.2   | 0.0   | 33.0  | 96.3  | 99.9  | 0.0 | 0.1     |
| ZBL204 | 34.7   | 0.0    | 0.0     | 28.6  | 0.2   | 0.1   | 33.0  | 96.6  | 99.9  | 0.0 | 0.1     |
| ZBL205 | 34.6   | 0.0    | 0.0     | 28.6  | 0.2   | 0.0   | 33.0  | 96.5  | 99.8  | 0.0 | 0.2     |
| ZBL206 | 34.7   | 0.0    | 0.0     | 28.3  | 0.2   | 0.0   | 33.0  | 96.3  | 99.9  | 0.0 | 0.1     |
| ZBL207 | 34.6   | 0.0    | 0.0     | 28.3  | 0.2   | 0.0   | 33.2  | 96.4  | 99.9  | 0.0 | 0.1     |
| ZBL208 | 34.7   | 0.0    | 0.0     | 28.2  | 0.2   | 0.1   | 33.1  | 96.3  | 99.9  | 0.0 | 0.1     |
| ZBL209 | 34.4   | 0.0    | 0.0     | 28.6  | 0.2   | 0.1   | 33.0  | 96.4  | 99.9  | 0.0 | 0.1     |
| ZBL210 | 34.6   | 0.0    | 0.0     | 28.3  | 0.3   | 0.0   | 33.0  | 96.2  | 99.9  | 0.0 | 0.1     |
| ZBL211 | 34.6   | 0.0    | 0.0     | 28.6  | 0.2   | 0.0   | 33.0  | 96.4  | 99.9  | 0.0 | 0.1     |
| ZBL212 | 34.6   | 0.0    | 0.0     | 28.4  | 0.2   | 0.1   | 33.0  | 96.3  | 100.0 | 0.0 | 0.0     |
| ZBL213 | 34.4   | 0.0    | 0.0     | 28.6  | 0.2   | 0.0   | 33.0  | 96.2  | 100.0 | 0.0 | 0.0     |
| ZBL214 | 34.3   | 0.0    | 0.0     | 28.4  | 0.2   | 0.0   | 33.0  | 96.0  | 99.9  | 0.0 | 0.1     |
| ZBL215 | 34.4   | 0.0    | 0.0     | 28.7  | 0.3   | 0.0   | 33.0  | 96.5  | 99.9  | 0.0 | 0.1     |
| ZBL216 | 34.3   | 0.0    | 0.0     | 28.5  | 0.2   | 0.0   | 33.0  | 96.2  | 99.9  | 0.0 | 0.1     |
| ZBL217 | 34.4   | 0.0    | 0.0     | 28.9  | 0.2   | 0.0   | 33.0  | 96.5  | 100.0 | 0.0 | 0.0     |
| ZBL218 | 34.2   | 0.0    | 0.0     | 28.2  | 0.2   | 0.0   | 33.1  | 95.8  | 100.0 | 0.0 | 0.0     |
| ZBL219 | 33.7   | 0.0    | 0.0     | 28.4  | 0.2   | 0.0   | 32.9  | 95.2  | 99.9  | 0.0 | 0.1     |
| ZBL220 | 33.5   | 0.0    | 0.0     | 28.6  | 0.3   | 0.1   | 33.0  | 95.4  | 100.0 | 0.0 | 0.0     |
| ZBL221 | 33.5   | 0.0    | 0.0     | 28.2  | 0.2   | 0.0   | 33.0  | 95.0  | 99.9  | 0.0 | 0.1     |
| ZBL222 | 33.6   | 0.0    | 0.0     | 28.7  | 0.2   | 0.0   | 33.0  | 95.5  | 100.0 | 0.0 | 0.0     |

|        |        |        |         |       |       |       |       |       |       |     |         |
|--------|--------|--------|---------|-------|-------|-------|-------|-------|-------|-----|---------|
| ZBL223 | 33.6   | 0.0    | 0.0     | 28.3  | 0.2   | 0.1   | 32.9  | 95.1  | 100.0 | 0.0 | 0.0     |
| ZBL224 | 33.7   | 0.0    | 0.0     | 28.6  | 0.2   | 0.0   | 32.9  | 95.6  | 99.9  | 0.0 | 0.1     |
| ZBL225 | 33.7   | 0.0    | 0.0     | 28.2  | 0.3   | 0.0   | 32.9  | 95.2  | 99.9  | 0.0 | 0.1     |
| ZBL226 | 33.6   | 0.0    | 0.0     | 28.4  | 0.2   | 0.0   | 33.1  | 95.3  | 100.0 | 0.0 | 0.0     |
| Sample | SiO2/% | TiO2/% | Al2O3/% | FeO/% | MnO/% | MgO/% | CaO/% | Total | Adr   | Grs | Sps+Prp |
| ZBL227 | 33.8   | 0.0    | 0.0     | 28.3  | 0.2   | 0.1   | 32.9  | 95.2  | 100.0 | 0.0 | 0.0     |
| ZBL228 | 33.9   | 0.0    | 0.0     | 28.5  | 0.2   | 0.0   | 33.0  | 95.6  | 99.9  | 0.0 | 0.1     |
| ZBL229 | 33.8   | 0.0    | 0.0     | 28.3  | 0.2   | 0.0   | 33.0  | 95.3  | 99.9  | 0.0 | 0.1     |
| ZBL230 | 33.7   | 0.0    | 0.0     | 28.4  | 0.2   | 0.1   | 32.9  | 95.4  | 99.9  | 0.0 | 0.1     |
| ZBL231 | 33.8   | 0.0    | 0.0     | 28.6  | 0.2   | 0.0   | 32.9  | 95.6  | 99.9  | 0.0 | 0.1     |
| ZBL232 | 33.8   | 0.0    | 0.0     | 28.3  | 0.2   | 0.1   | 32.9  | 95.3  | 100.0 | 0.0 | 0.0     |
| ZBL233 | 33.8   | 0.0    | 0.0     | 28.5  | 0.2   | 0.0   | 32.9  | 95.4  | 100.0 | 0.0 | 0.0     |
| ZBL234 | 33.9   | 0.0    | 0.0     | 28.5  | 0.2   | 0.0   | 32.9  | 95.6  | 100.0 | 0.0 | 0.0     |
| ZBL235 | 35.3   | 0.0    | 0.0     | 28.6  | 0.2   | 0.0   | 32.8  | 97.1  | 99.9  | 0.0 | 0.1     |
