# Supplementary material for: U–Pb dating of andradite-rich garnet by SIMS
Source: Royal Society of Chemistry journal article supplement (doi:10.1039/d1ja00384d), 2022-01-01
Supplement: d1ja00384d4.pdf [file d1ja00384d4.pdf]

### Oxygen Flooding Test

| Name                            | $^{206}\text{Pb}/^{56}\text{Fe}_3^{16}\text{O}$ | error(1 $\sigma$ %) | $^{207}\text{Pb}/^{206}\text{Pb}$ | error(1 $\sigma$ %) | $^{56}\text{Fe}_3^{16}\text{O}$ | error(1 $\sigma$ %) | $^{206}\text{Pb}$ | error(1 $\sigma$ %) |
|---------------------------------|-------------------------------------------------|---------------------|-----------------------------------|---------------------|---------------------------------|---------------------|-------------------|---------------------|
| WS20 Pb Oxygen flooding@1       | 0.10                                            | 0.24                | 0.08                              | 2.60                | 32599.4                         | 0.9                 | 3413.6            | 0.8                 |
| WS20 Pb Oxygen flooding@2       | 0.11                                            | 0.49                | 0.08                              | 0.66                | 32285.9                         | 0.7                 | 3581.3            | 0.9                 |
| WS20 Pb Oxygen flooding@3       | 0.12                                            | 0.52                | 0.08                              | 1.56                | 32275.5                         | 0.6                 | 3796.0            | 0.9                 |
| WS20 Pb WithOut Oxygen flooding | 0.12                                            | 0.70                | 0.08                              | 1.26                | 33786.1                         | 0.9                 | 3943.5            | 0.8                 |
| WS20 Pb WithOut Oxygen floo     | 0.10                                            | 0.51                | 0.08                              | 0.61                | 34500.4                         | 0.6                 | 3598.4            | 0.6                 |
| WS20 Pb WithOut Oxygen floo     | 0.10                                            | 0.73                | 0.08                              | 1.03                | 34973.7                         | 0.4                 | 3543.5            | 1.1                 |
