# Supplementary figures and images for: U–Pb dating of andradite-rich garnet by SIMS
Source: Royal Society of Chemistry journal article supplement (doi:10.1039/d1ja00384d), 2022-01-01

# Session 2:

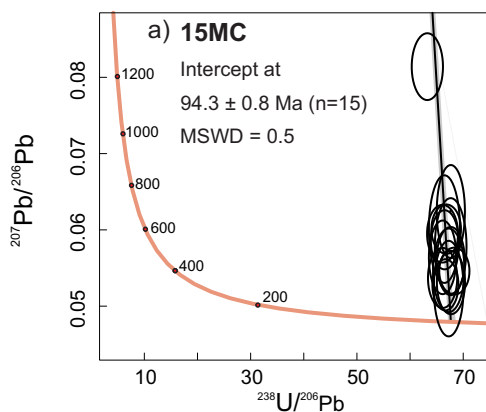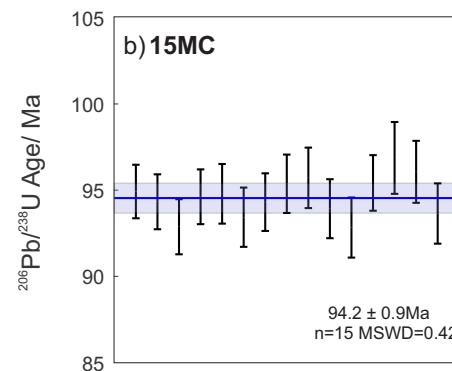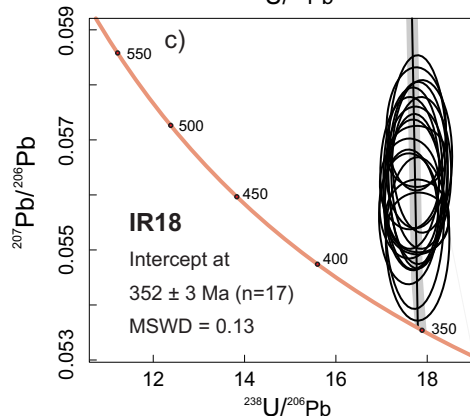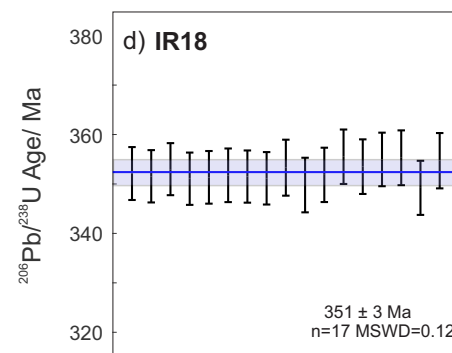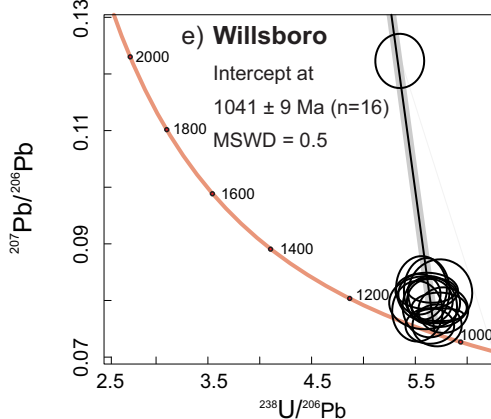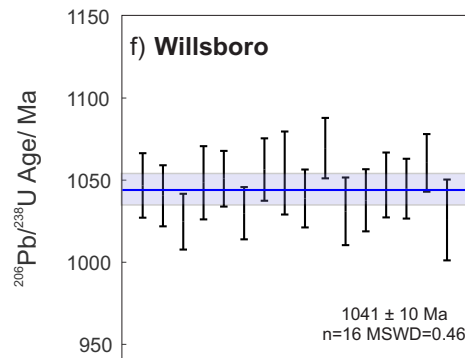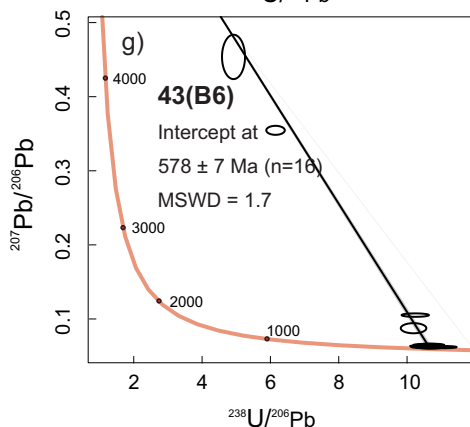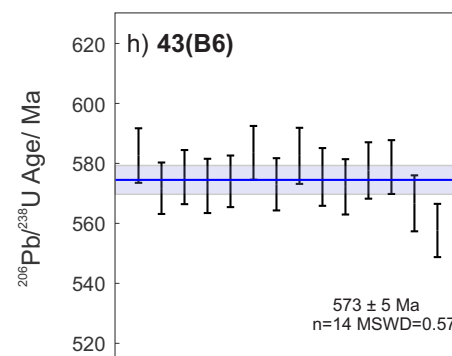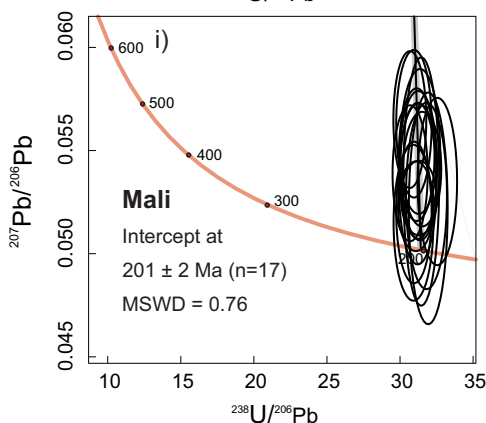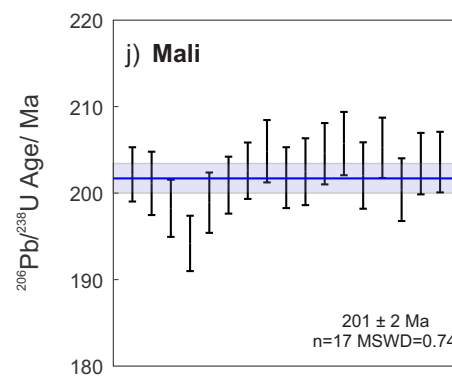

Supplement: d1ja00384d3.pdf [file d1ja00384d3.pdf]
